# Supplementary material
Source: Springer Nature journal article supplement (https://www.springermedizin.de/resource/supplementary/13075_2009_2777_MOESM3_ESM.pdf/9692860)

**A****MMPs mRNA expression**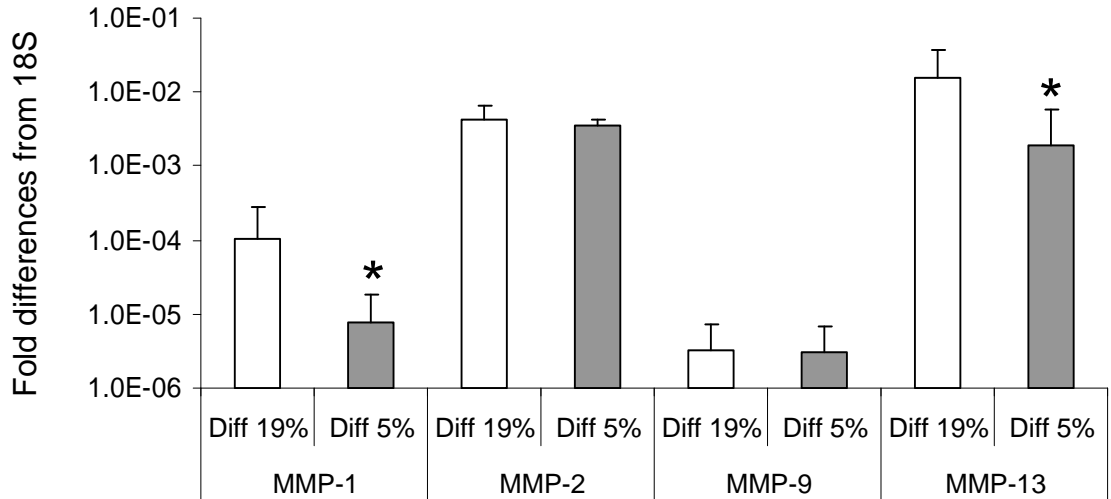**B****MMPs protein release**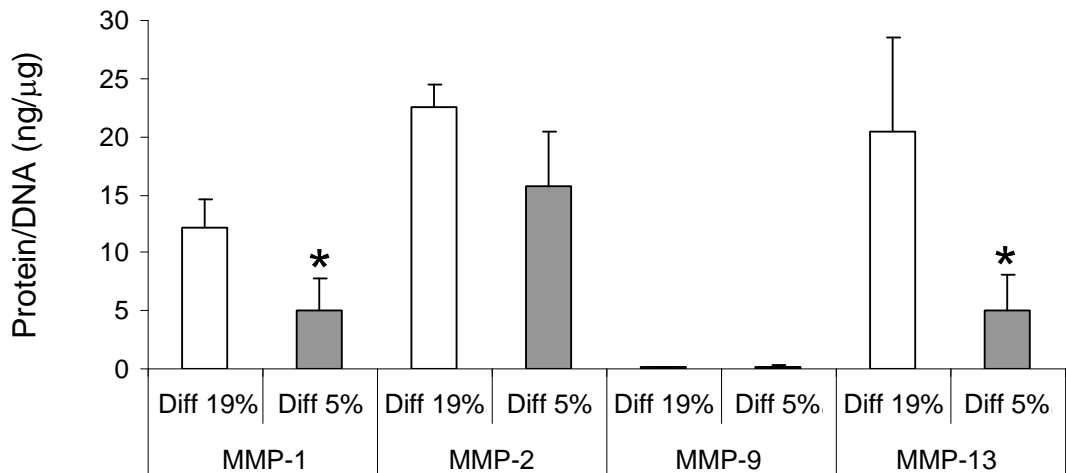

Supplement: MOESM3 [file 9692860]
